# Supplementary material for: Investigating Glycol-Split-Heparin-Derived Inhibitors of Heparanase: A Study of Synthetic Trisaccharides
Source: Molecules. 2016 Nov 23;21(11):1602. doi: 10.3390/molecules21111602 (PMC6274180; doi:10.3390/molecules21111602)
Supplement: Supplementary file 1 [file molecules-21-01602-s001.pdf]

# Supplementary Materials: Investigating Glycol-Split-Heparin-Derived Inhibitors of Heparanase: Study of Synthetic Trisaccharides

Minghong Ni, Stefano Elli, Annamaria Naggi, Marco Guerrini, Giangiacomo Torri and Maurice Petitou

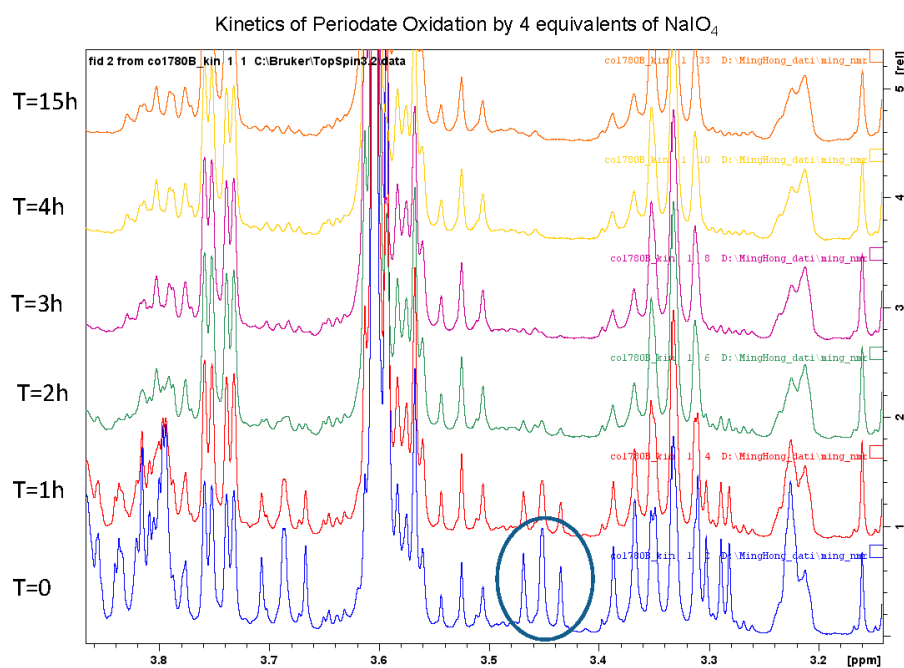

**Figure S1.**  $^1\text{H}$ -NMR spectra used to monitor the periodate oxidation of **1**. The circled signal that disappears throughout the reaction corresponds to H-2' of GlcA (3.44 ppm).

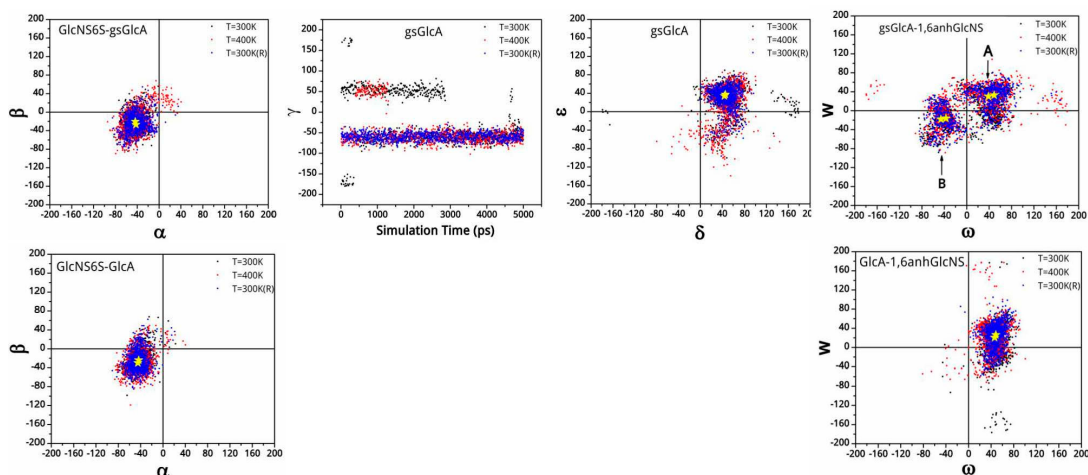

**Figure S2.** Backbone computed dihedral angles:  $\alpha/\beta$ ,  $\gamma$ ,  $\delta/\epsilon$ ,  $\omega/w$  for compound **2** (top) and the comparable  $\alpha/\beta$ ,  $\omega/w$  for compound **1** (bottom) sampled during selected MD simulations steps at temperature 300 K (step 1, black dots), 400 K (step 6, red dots) and 300 K (step 11, blue dots). The dihedral angles pairs:  $\alpha/\beta$ ,  $\gamma$ ,  $\delta/\epsilon$ ,  $\omega/w$  are reported in Ramachandran diagrams, while  $\gamma$  is reported as a function of simulation time. Two possible conformations for compound **2**, characterized by different glycosidic state  $\omega/w$  (see Table S2) are found (A, and B). Yellow stars in Ramachandran plots indicate torsional states defined by averaging the corresponding dihedral angle pairs for a suitable amount of simulation time.

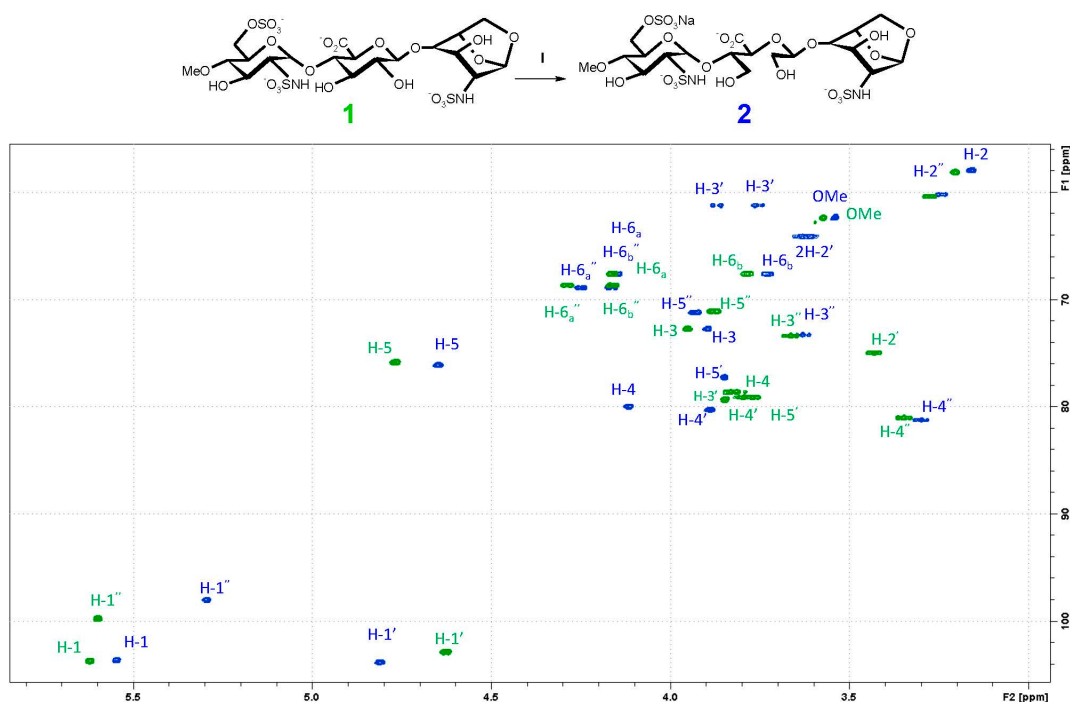

**Figure S3.** 2D HSQC spectra of compound 1 (green) and 2 (blue). (no quote, quote and double quote respectively refer to reducing-end unit, central unit and non reducing end unit).

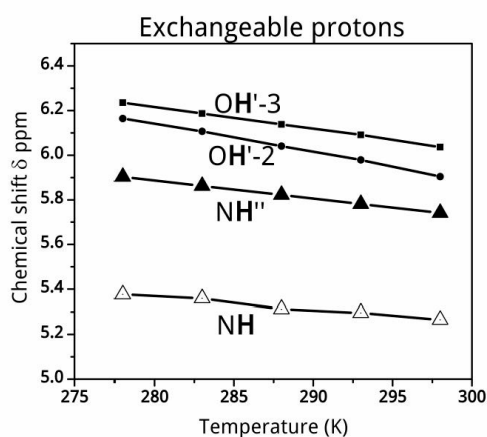

**Figure S4.** Plot of the chemical shift of exchangeable protons in 2 vs. temperature (K).

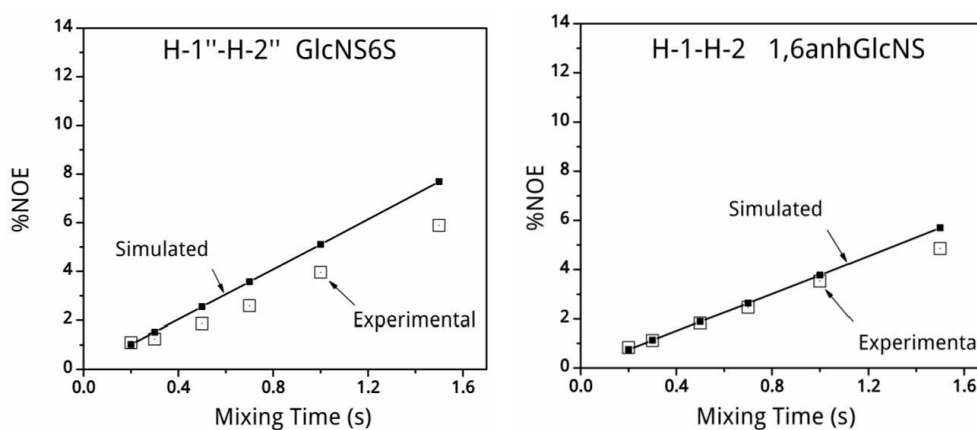

**Figure S5.** Intra-residue experimental (empty symbols) and simulated (black line) 2D NOEs build up curves for the glucosamine units in 2. The simulation was performed using the A conformer (see text).

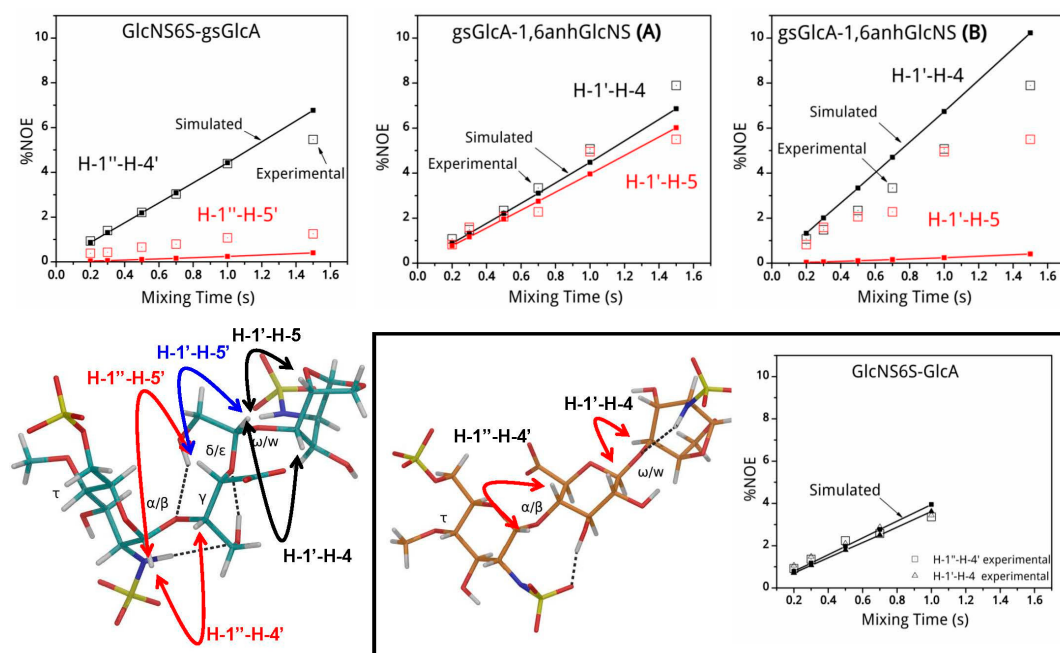

**Figure S6.** Selected 2D NOEs. Upper part: Selected inter-glycosidic 2D NOEs build up curves for the two (see Figure S2, **A** and **B**) predicted conformations of **2** at mixing time between 0.2 to 1.5 s. Comparison of the middle and right panels shows the better fit obtained between experimental and modelled curves when the **A** conformer is used for the calculation. Lower part: A licorice representation of **2** in conformation **A** showing the previously discussed inter-residue NOEs. On the right a good fit is obtained between experimental and calculated NOEs for the obtained conformation of **1**.

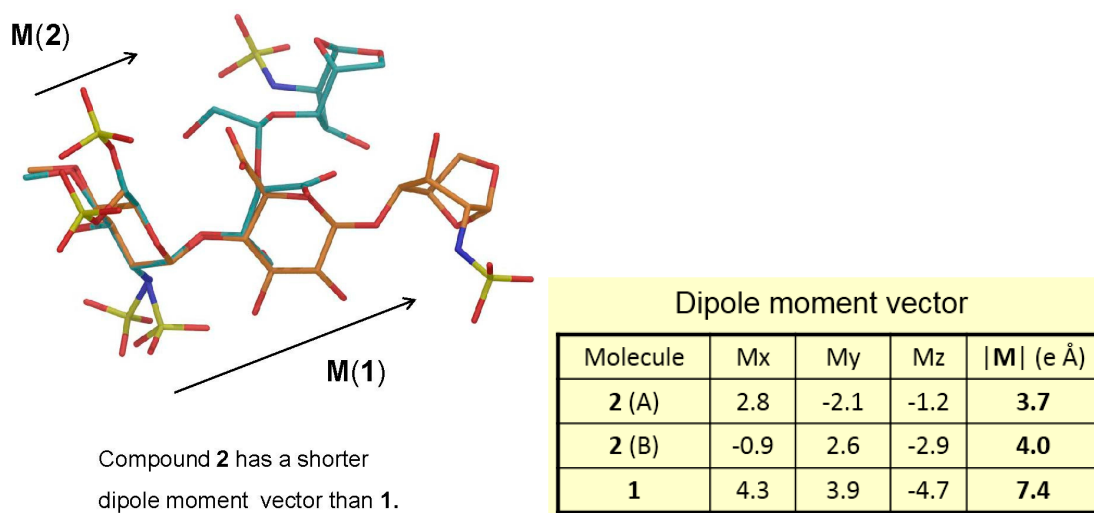

**Figure S7.** Distribution charge properties: dipole moment lenght and components, estimated for **1** and **2** in the previously determined conformations using the approach AM1-BCC (see text). On the left, the non-reducing end residues of **1** and **2** have been superposed.

**Table S1.** Summary of the MD simulation thermal history for the model of compound **1** and **2**.

[illegible]

**Table S2.** Backbone torsional angles for **1** and **2**. Values in **black** refer to the two initial conformations setted for each glycans (**1.1–1.2** and **2.1–2.2**) (black coloured lines). Values in red are the torsional angles obtained. Compound **2** significantly populates two states (A and B) at the torsional degree of freedom  $\omega/w$ .

|   |                  | Torsional Angles (°) |                |            |                   |                              |
|---|------------------|----------------------|----------------|------------|-------------------|------------------------------|
|   |                  | $\tau$               | $\alpha/\beta$ | $\gamma$   | $\delta/\epsilon$ | $\omega/w$                   |
| 1 | Initial 1.1      | -20                  | -40/-26        | –          | –                 | 53/9                         |
|   | <b>Final 1.1</b> | <b>-17</b>           | <b>-44/-24</b> | –          | –                 | <b>49/26</b>                 |
|   | Initial 1.2      | -60                  | -20/26         | –          | –                 | -30/-30                      |
|   | <b>Final 1.2</b> | <b>-15</b>           | <b>-45/-30</b> | –          | –                 | <b>46/21</b>                 |
| 2 | Initial 2.1      | -61                  | -52/-26        | 180        | 50/51             | 56/7                         |
|   | <b>Final 2.1</b> | <b>-19</b>           | <b>-42/-27</b> | <b>-59</b> | <b>44/34</b>      | <b>49/33 (A) -37/-16 (B)</b> |
|   | Initial 2.2      | 180                  | -30/-50        | 61         | 0/30              | -40/10                       |
|   | <b>Final 2.2</b> | <b>-20</b>           | <b>-44/-20</b> | <b>-69</b> | <b>46/37</b>      | <b>39/30 (A) -46/-18 (B)</b> |

**Table S3.** Temperature coefficients  $\Delta\delta$  (ppb·K<sup>-1</sup>) estimated by linear regression. The estimated errors ( $\Delta\Delta\delta$ ) is shown on the last decimal digit. The linear correlation coefficient ( $R$ ) is reported

| H-Bond | $\Delta\delta$ ( $\Delta\Delta\delta$ ) | $R$      |
|--------|-----------------------------------------|----------|
| OH'-3  | -9.8 (2)                                | -0.9996  |
| OH'-2  | -13.0 (3)                               | -0.9991  |
| NH''   | -8.09 (3)                               | -0.99997 |
| NH     | -5.7 (5)                                | -0.9891  |
